# Supplementary material for: Divergence of Iron Metabolism in Wild Malaysian Yeast
Source: PubMed Central journal article supplement (PMC3852381; doi:10.1534/g3.113.008011), 2013-10-18
Supplement: supp_g3.113.008011_008011SI.pdf [file supp_g3.113.008011_008011SI.pdf]

## Divergence of iron metabolism in wild Malaysian yeast

Hana N. Lee<sup>¶</sup>, Yulia Mostovoy<sup>^</sup>, Tiffany Y. Hsu<sup>§</sup>, Amanda H. Chang, and Rachel B. Brem<sup>\*</sup>

Department of Molecular and Cell Biology, University of California, Berkeley

<sup>¶</sup>Current address: Department of Ecology and Evolution, University of Chicago, Chicago, IL

<sup>§</sup>Current address: Graduate Program in Biological and Biomedical Sciences, Harvard Medical School, Boston, MA

<sup>^</sup>These authors contributed equally to this work.

<sup>\*</sup>To whom correspondence should be addressed: [rbrem@berkeley.edu](mailto:rbrem@berkeley.edu)

DOI: 10.1534/g3.113.008011

**A**

|               |    | ★ ★ bZIP_1                                                                   |    |  |  |
|---------------|----|------------------------------------------------------------------------------|----|--|--|
|               |    | R44G Q67H                                                                    |    |  |  |
| YPS606        | 21 | KIHVSKNWKLPRLPHRAAQRKRVRHLHEDYETEENDEELQKKRQNRDAQRAYRERKN                    | 80 |  |  |
| Y12           | 21 | KIHVSKNWKLPRLPHRAAQRKRVRHLHEDYETEENDEELQKKRQNRDAQRAYRERKN                    | 80 |  |  |
| YPS128        | 21 | KIHVSKNWKLPRLPHRAAQRKRVRHLHEDYETEENDEELQKKRQNRDAQRAYRERKN                    | 80 |  |  |
| Y9            | 21 | KIHVSKNWKLPRLPHRAAQRKRVRHLHEDYETEENDEELQKKRQNRDAQRAYRERKN                    | 80 |  |  |
| DBVPG6765     | 21 | KIHVSKNWKLPRLPHRAAQRKRVRHLHEDYETEENDEELQKKRQNRDAQRAYRERKN                    | 80 |  |  |
| BC187         | 21 | KIHVSKNWKLPRLPHRAAQRKRVRHLHEDYETEENDEELQKKRQNRDAQRAYRERKN                    | 80 |  |  |
| YJM981        | 21 | KIHVSKNWKLPRLPHRAAQRKRVRHLHEDYETEENDEELQKKRQNRDAQRAYRERKN                    | 80 |  |  |
| DBVPG1106     | 21 | KIHVSKNWKLPRLPHRAAQRKRVRHLHEDYETEENDEELQKKRQNRDAQRAYRERKN                    | 80 |  |  |
| DBVPG1373     | 21 | KIHVSKNWKLPRLPHRAAQRKRVRHLHEDYETEENDEELQKKRQNRDAQRAYRERKN                    | 80 |  |  |
| YJM978        | 21 | KIHVSKNWKLPRLPHRAAQRKRVRHLHEDYETEENDEELQKKRQNRDAQRAYRERKN                    | 80 |  |  |
| S288c         | 21 | KIHVSKNWKLPRLPHRAAQRKRVRHLHEDYETEENDEELQKKRQNRDAQRAYRERKN                    | 80 |  |  |
| YJM975        | 21 | KIHVSKNWKLPRLPHRAAQRKRVRHLHEDYETEENDEELQKKRQNRDAQRAYRERKN                    | 80 |  |  |
| L_1528        | 21 | KIHVSKNWKLPRLPHRAAQRKRVRHLHEDYETEENDEELQKKRQNRDAQRAYRERKN                    | 80 |  |  |
| RM11_1A       | 21 | KIHVSKNWKLPRLPHRAAQRKRVRHLHEDYETEENDEELQKKRQNRDAQRAYRERKN                    | 80 |  |  |
| DBVPG1788     | 21 | KIHVSKNWKLPRLPHRAAQRKRVRHLHEDYETEENDEELQKKRQNRDAQRAYRERKN                    | 80 |  |  |
| L_1374        | 21 | KIHVSKNWKLPRLPHRAAQRKRVRHLHEDYETEENDEELQKKRQNRDAQRAYRERKN                    | 80 |  |  |
| UWOPS05_227_2 | 21 | KIHVSKNWKLPRLPHRAAQRKR <b>G</b> VHRLHEDYETEENDEELQKKR <b>H</b> NRDAQRAYRERKN | 80 |  |  |
| UWOPS05_217_3 | 21 | KIHVSKNWKLPRLPHRAAQRKR <b>G</b> VHRLHEDYETEENDEELQKKR <b>H</b> NRDAQRAYRERKN | 80 |  |  |
| UWOPS03_461_4 | 21 | KIHVSKNWKLPRLPHRAAQRKR <b>G</b> VHRLHEDYETEENDEELQKKR <b>H</b> NRDAQRAYRERKN | 80 |  |  |
| DBVPG6044     | 21 | KIHVSKNWKLPRLPHRAAQRKRVRHLHEDYETEENDEELQKKRQNRDAQRAYRERQN                    | 80 |  |  |
| NCYC110       | 21 | KIHVSKNWKLPRLPHRAAQRKRVRHLHEDYETEENDEELQKKRQNRDAQRAYRERQN                    | 80 |  |  |
| S. paradoxus  | 21 | KIHVSKNWKLPRLPHRATQRKRRAHRLHEEYETEGNDEALQKKRQNRDAQRAYRERKN                   | 80 |  |  |

**B**

|               |   | ★ VIT1                                                         |    |  |  |
|---------------|---|----------------------------------------------------------------|----|--|--|
|               |   | G22R                                                           |    |  |  |
| UWOPS05_227_2 | 1 | MSIVALKNNAVVTLIQKAKGSGRTSELGGSESTPLLRGSNSNSSRHDNLSSSSSDI IYGRN | 60 |  |  |
| UWOPS05_217_3 | 1 | MSIVALKNNAVVTLIQKAKGSGRTSELGGSESTPLLRGSNSNSSRHDNLSSSSSDI IYGRN | 60 |  |  |
| UWOPS03_461_4 | 1 | MSIVALKNNAVVTLIQKAKGSGRTSELGGSESTPLLRGSNSNSSRHDNLSSSSSDI IYGRN | 60 |  |  |
| DBVPG6765     | 1 | MSIVALKNNAVVTLIQKAKGSGGTSELGGSESTPLLRGSNSNSSRHDNLSSSSSDI IYGRN | 60 |  |  |
| DBVPG1788     | 1 | MSIVALKNNAVVTLIQKAKGSGGTSELGGSESTPLLRGSNSNSSRHDNLSSSSSDI IYGRN | 60 |  |  |
| RM11_1A       | 1 | MSIVALKNNAVVTLIQKAKGSGGTSELGGSESTPLLRGSNSNSSRHDNLSSSSSDI IYGRN | 60 |  |  |
| L_1528        | 1 | MSIVALKNNAVVTLIQKAKGSGGTSELGGSESTPLLRGSNSNSSRHDNLSSSSSDI IYGRN | 60 |  |  |
| YJM789        | 1 | MSIVALKNNAVVTLIQKAKGSGGTSELGGSESTPLLRGSNSNSSRHDNLSSSSSDI IYGRN | 60 |  |  |
| YJM975        | 1 | MSIVALKNNAVVTLIQKAKGSGGTSELGGSESTPLLRGSNSNSSRHDNLSSSSSDI IYGRN | 60 |  |  |
| L_1374        | 1 | MSIVALKNNAVVTLIQKAKGSGGTSELGGSESTPLLRGSNSNSSRHDNLSSSSSDI IYGRN | 60 |  |  |
| S288c         | 1 | MSIVALKNNAVVTLIQKAKGSGGTSELGGSESTPLLRGSNSNSSRHDNLSSSSSDI IYGRN | 60 |  |  |
| YPS606        | 1 | MSIVALKNNAVVTLIQKAKGSGGTSELGGSESTPLLRGSNSNSSRHDNLSSSSSDI IYGRN | 60 |  |  |
| Y12           | 1 | MSIVALKNNAVVTLIQKAKGSGGTSELGGSESTPLLRGSNSNSSRHDNLSSSSSDI IYGRN | 60 |  |  |
| YPS128        | 1 | MSIVALKNNAVVTLIQKAKGSGGTSELGGSESTPLLRGSNSNSSRHDNLSSSSSDI IYGRN | 60 |  |  |
| YJM978        | 1 | MSIVALKNNAVVTLIQKAKGSGGTSELGGSESTPLLRGSNSNSSRHDNLSSSSSDI IYGRN | 60 |  |  |
| Y9            | 1 | MSIVALKNNAVVTLIQKAKGSGGTSELGGSESTPLLRGSNSNSSRHDNLSSSSSDI IYGRN | 60 |  |  |
| NCYC110       | 1 | MSIVALKNNAVVTLIQKAKGSGGTSELGGSESTPLLRGSNSNSSRHDNLSSSSSDI IYGRN | 60 |  |  |
| DBVPG1373     | 1 | MSIVALKNNAVVTLIQKAKGSGGTSELGGSESTPLLRGSNSNSSRHDNLSSSSSDI IYGRN | 60 |  |  |
| YJM981        | 1 | MSIVALKNNAVVTLIQKAKGSGGTSELGGSESTPLLRGSNSNSSRHDNLSSSSSDI IYGRN | 60 |  |  |
| BC187         | 1 | MSIVALKNNAVVTLIQKAKGSGGTSELGGSESTPLLRGSNSNSSRHDNLSSSSSDI IYGRN | 60 |  |  |
| DBVPG1106     | 1 | MSIVALKNNAVVTLIQKAKGSGGTSELGGSESTPLLRGSNSNSSRHDNLSSSSSDI IYGRN | 60 |  |  |
| DBVPG6044     | 1 | MSIVALKNNAVVTLIQKAKGSGGTSELGGSESTPLLRGSNSNSSRHDNLSSSSSDI IYGRN | 60 |  |  |
| S. paradoxus  | 1 | MSIVALKNNAVVTLIQKAKGSGGTSDLGGSESTPLLRGSNSNSSRHDNLSSSSSDI IYGRN | 60 |  |  |

**C**

|               |     | NLS                                                                   |     | NLS |  |       |  |
|---------------|-----|-----------------------------------------------------------------------|-----|-----|--|-------|--|
|               |     | AFT                                                                   |     | ★   |  | P354S |  |
| K11           | 301 | SFNVVLPNNSVNTSSASSSTVSSISLDSSNASKRCLPSPVNTGSIINTNNVRKPKSQCKN          | 360 |     |  |       |  |
| Y12           | 301 | SFNVVLPNNSVNTSSASSSTVSSISLDSSNASKRCLPSPVNTGSIINTNNVRKPKSQCKN          | 360 |     |  |       |  |
| Y9            | 301 | SFNVVLPNNSVNTSSASSSTVSSISLDSSNASKRCLPSPVNTGSIINTNNVRKPKSQCKN          | 360 |     |  |       |  |
| NCYC110       | 301 | SFNVVLPNNSVNTSSASSSTVSSISLDSSNASKRCLPSPVNTGSIINTNNVRKPKSQCKN          | 360 |     |  |       |  |
| DBVPG6044     | 301 | SFNVVLPNNSVNTSSASSSTVSSISLDSSNASKRCLPSPVNTGSIINTNNVRKPKSQCKN          | 360 |     |  |       |  |
| UWOPS05_227_2 | 301 | SFNVVLPNNSVNTSSASSSTVSSISLDSSNASKRCLPSPVNTGSIINTNNVRK <b>S</b> KSQCKN | 360 |     |  |       |  |
| UWOPS05_217_3 | 301 | SFNVVLPNNSVNTSSASSSTVSSISLDSSNASKRCLPSPVNTGSIINTNNVRK <b>S</b> KSQCKN | 360 |     |  |       |  |
| UWOPS03_461_4 | 301 | SFNVVLPNNSVNTSSASSSTVSSISLDSSNASKRCLPSPVNTGSIINTNNVRK <b>S</b> KSQCKN | 360 |     |  |       |  |
| YPS606        | 301 | SFNVVLPNNSVNTSSASSSTVSSISLDSSNASKRCLPSPVNTGSIINTNNVRKPKSQCKN          | 360 |     |  |       |  |
| YPS128        | 301 | SFNVVLPNNSVNTSSASSSTVSSISLDSSNASKRCLPSPVNTGSIINTNNVRKPKSQCKN          | 360 |     |  |       |  |
| DBVPG6765     | 301 | SFNVVLPNNSVNTSSASSSTVSSISLDSSNASKRCLPSPVNTGSIINTNNVRKPKSQCKN          | 360 |     |  |       |  |
| YJM975        | 301 | SFNVVLPNNSVNTSSASSSTVSSISLDSSNASKRCLPSPVNTGSIINTNNVRKPKSQCKN          | 360 |     |  |       |  |
| BC187         | 301 | SFNVVLPNNSVNTSSASSSTVSSISLDSSNASKRCLPSPVNTGSIINTNNVRKPKSQCKN          | 360 |     |  |       |  |
| YJM981        | 301 | SFNVVLPNNSVNTSSASSSTVSSISLDSSNASKRCLPSPVNTGSIINTNNVRKPKSQCKN          | 360 |     |  |       |  |
| DBVPG1106     | 301 | SFNVVLPNNSVNTSSASSSTVSSISLDSSNASKRCLPSPVNTGSIINTNNVRKPKSQCKN          | 360 |     |  |       |  |
| DBVPG1373     | 301 | SFNVVLPNNSVNTSSASSSTVSSISLDSSNASKRCLPSPVNTGSIINTNNVRKPKSQCKN          | 360 |     |  |       |  |
| Y55           | 301 | SFNVVLPNNSVNTSSASSSTVSSISLDSSNASKRCLPSPVNTGSIINTNNVRKPKSQCKN          | 360 |     |  |       |  |
| YJM978        | 301 | SFNVVLPNNSVNTSSASSSTVSSISLDSSNASKRCLPSPVNTGSIINTNNVRKPKSQCKN          | 360 |     |  |       |  |
| L_1374        | 301 | SFNVVLPNNSVNTSSASSSTVSSISLDSSNASKRCLPSPVNTGSIINTNNVRKPKSQCKN          | 360 |     |  |       |  |
| L_1528        | 301 | SFNVVLPNNSVNTSSASSSTVSSISLDSSNASKRCLPSPVNTGSIINTNNVRKPKSQCKN          | 360 |     |  |       |  |
| DBVPG1788     | 301 | SFNVVLPNNSVNTSSASSSTVSSISLDSSNASKRCLPSPVNTGSIINTNNVRKPKSQCKN          | 360 |     |  |       |  |
| RM11_1A       | 301 | SFNVVLPNNSVNTSSASSSTVSSISLDSSNASKRCLPSPVNTGSIINTNNVRKPKSQCKN          | 360 |     |  |       |  |
| S. paradoxus  | 299 | SFNVVLPNNSVNTSSASSSTVSSISLDSSNASKRCLPSPVNTGSIINTNNVRKPKSQCKN          | 358 |     |  |       |  |

**Figure S1 Coding variants private to Malaysian yeast strains in iron-metabolism genes.** Each panel shows the coding variants private to Malaysian yeast in one iron-metabolism protein, with the variants denoted as stars in a cartoon of the protein's domain organization at top, and a protein-coding alignment below for the region containing the Malaysian variant, using sequence and strain identifiers from (LIT *et al.* 2009). (A) Yap5p; (B) Ccc1p; (C) Aft1p. Non-synonymous coding variants private to the Malaysian population are indicated in red. bZIP\_1, basic leucine zipper domain, PFAM clan 1; VIT1, vacuolar iron transport domain; AFT, activator of iron transcription domain; NLS, nuclear localization signal.

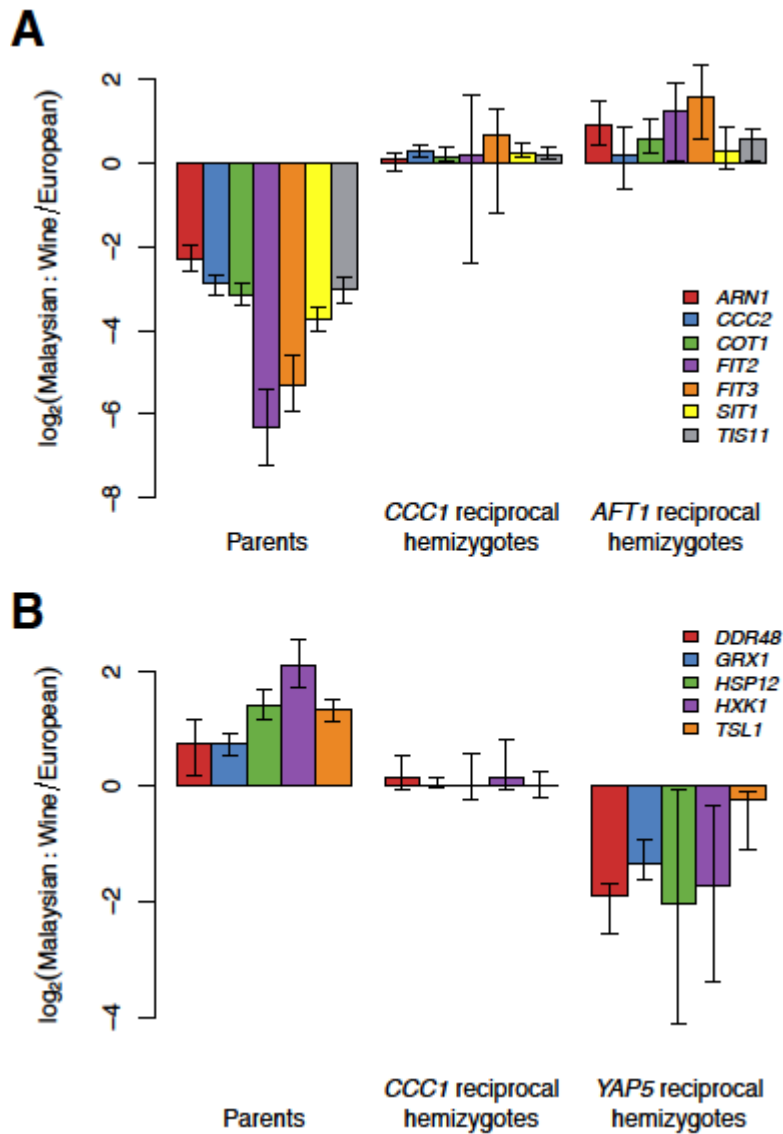

**Figure S2 Regulatory impact of variation in *AFT1*, *CCC1*, and *YAP5* between Malaysian and wine/European yeast.** Data are as in Figure 4 of the main text except that distributions of expression measurements across experimental replicates are shown. Each panel reports expression of iron-starvation (GASCH *et al.* 2004) and iron-resistance (LIN *et al.* 2011; PIMENTEL *et al.* 2012) genes as ratios of the levels measured in two strains derived from a Malaysian (UWOPS03.461.4) and a wine/European strain (BC187). At left in each row, each bar reports the median across replicates ( $n = 2$ ) of the ratio of expression of the indicated gene between a Malaysian homozygote and a wine/European homozygote. In each remaining panel, each bar reports the median across replicates (*CCC1*,  $n = 8$ ; *AFT1*,  $n = 4$ ; *YAP5*,  $n = 4$ ) of the ratio of expression of the indicated gene between a Malaysian-wine/European hemizygote bearing the Malaysian allele of the indicated variant locus, and the hemizygote bearing the wine/European allele. Error bars report 95% confidence intervals. (A) Iron-starvation genes in synthetic complete medium. (B) Iron-resistance genes in synthetic complete medium supplemented with 5 mM FeSO<sub>4</sub>. Raw data are reported in Supplementary Data Sets 7 and 8.

**File S1 Single-nucleotide polymorphisms in Malaysian and wine/European coding sequences inferred from RNA-seq.** Each file reports single-nucleotide polymorphisms (SNPs) in open reading frames of one yeast strain, called with respect to the genome of the reference laboratory strain S288C ([www.yeastgenome.org](http://www.yeastgenome.org)). In a given file, each row reports genotype information at one SNP position: the first column gives the chromosome identifier, the second column gives the position on the indicated chromosome, the third and fourth columns give the base present in the reference genome and the strain of interest, respectively, and the fifth column gives the Phred score of the genotype call.

**File S2 Expression profiles of Malaysian and wine/European yeast, measured by RNA-seq.** Each row reports a comparison of the expression of one gene between homozygote Malaysian (UWOPS03.461.4, UWOPS05.217.3, and UWOPS05.227.2) and wine/European (BC187 and RM11-1) yeast strains grown in standard culture conditions. For a given row, the second through sixth columns report raw counts of RNA-seq reads mapped to the indicated gene in libraries from the indicated strain. The remaining columns report the results of normalization and statistical testing from the DEseq software suite (Anders, Huber 2010): mean, average normalized expression of the indicated gene over all strains; WE\_mean, average normalized expression across wine/European strains; M\_mean, average normalized expression across Malaysian strains; foldChange and log2FoldChange, ratio and log<sub>2</sub> ratio of the normalized mean expression in Malaysian strains relative to wine/European strains; pval, *p*-value assessing significance, in a negative binomial-based test, of the differential expression between populations; padj, corrected *p*-value by the Benjamini-Hochberg method.

**File S3 Expression profiles of hybrid strains formed by a mating between Malaysian and wine/European yeast, measured by RNA-seq.** Each row reports comparisons of the expression of the Malaysian allele of a gene to that of the wine/European allele of a gene, in hybrids formed by matings of Malaysian and wine/European strains. For a given gene, the second through sixth columns report raw counts of RNA-seq reads mapped to the indicated allele (M, Malaysian; WE, wine/European) in one hybrid strain, with identifiers as in Supplementary Table 2: YHL058, the Malaysian UWOPS03.461.4 mated to the wine/European RM11; YHL063, the Malaysian UWOPS03.461.4 mated to the wine/European BC187; YHL065, UWOPS05.217.3 mated to BC187. The remaining columns report the results of normalization and statistical testing from the DEseq software suite (Anders, Huber 2010): mean, average normalized expression of the indicated gene over all strains and alleles; WE\_mean, average normalized expression across the wine/European alleles of all strains; M\_mean, average normalized expression of the Malaysian alleles across all strains; foldChange and log2FoldChange, ratio and log<sub>2</sub> ratio of the normalized mean expression of the Malaysian allele across all strains relative to that of the wine/European allele; pval, *p*-value assessing significance, in a negative binomial-based test, of differential allele-specific expression considering measures across the strains as replicates; padj, corrected *p*-value by the Benjamini-Hochberg method.

**File S4 Directional *cis*-regulatory variation between Malaysian and wine/European yeast in co-regulated gene groups.** Each row reports the results of a test for directional coherence of *cis*-regulatory variation between Malaysian and wine/European yeast in one group of functionally related genes, measured using reads uniquely mapped to each parent's allele of a given gene in turn, in hybrids formed by mating Malaysian and wine/European strains. Group, identifier of regulon from (Gasch et al. 2004) or Gene Ontology term. Upregulated, population with elevated expression; gene groups with an average expression difference of 0 between the populations are denoted with NA. Adjusted *p*-value, significance of a two-sided resampling test relative to the genomic null for an extreme value of the sum, across genes of the indicated regulon, of the log<sub>2</sub> ratio of expression of the Malaysian allele of a given gene to expression of the wine/European allele, assessed using all isolates from each population and corrected for multiple testing with the Benjamini-Hochberg method. An additional test, not shown, for directional *cis*-regulatory variation across genes in a *ccc1* laboratory strain compared to wild-type during high-iron treatment (Lin et al. 2011) yielded a nominal *p*-value of 0.12.

**File S5 Expression of iron-starvation genes in Malaysian and wine/European parent strains and reciprocal hemizygotes in standard conditions, measured by quantitative PCR.** Each column reports comparisons between the effects of Malaysian and wine/European genotypes on expression of an iron-starvation gene during growth in standard medium. The first six rows report expression in a Malaysian (UWOPS03.461.4) and a wine/European strain (BC187). The remaining rows report expression in reciprocal hemizygote pairs in the UWOPS03.461.4 x BC187 background. Each identifier of the form xxx/XXX-Malaysian denotes a reciprocal hemizygote bearing only the Malaysian allele of the gene of interest, and xxx/XXX-wineEuropean denotes a hemizygote bearing only the wine/European allele. In row headings, each numerical value represents one biological replicate, and each row reports one technical replicate.

**File S6 Expression of iron-resistance genes in Malaysian and wine/European parent strains and reciprocal hemizygotes in high-iron conditions, measured by quantitative PCR.** Data are as in File S5 except that strains were cultured in standard medium supplemented with 5 mM FeSO<sub>4</sub>, and iron-resistance gene expression was measured.

**File S7 Growth attributes, in standard conditions and in high iron, of Malaysian and wine/European yeast, their hybrids, and reciprocal hemizygotes for *AFT1*, *YAP5*, and *CCC1*.** Each row reports growth measurements, fitted to growth curves using the method of (Warringer et al. 2011), from one yeast culture in complete synthetic medium mock-treated (CSM) or treated with 5 mM FeSO<sub>4</sub>. Strain names are as in Table S2. Hybrid, wild-type diploid formed by a mating between a Malaysian and a wine/European strain. Each identifier of the form xxx/XXX-Malaysian denotes a reciprocal hemizygote bearing only the Malaysian allele of the gene of interest, and xxx/XXX-wineEuropean denotes a hemizygote bearing only the wine/European allele. Doubling time, the inverse of the slope of a line fitted to the relationship between time (in hours) and cell density during log-phase growth; lag time, the x-intercept of a line fitted to the relationship between time (in hours) and cell density between inoculation and the onset of log-phase growth; efficiency, the ratio between the cell density at the end of a culture and the density at the start.

**File S8 Growth attributes, in standard conditions and in high iron, of a panel of environmental yeast isolates.** Data are as in File S7 except that wild-type isolates from each of the yeast populations defined in (Liti et al. 2009) were analyzed.

**Table S1 RNA-seq statistics.**

| LIBRARY                | TOTAL READS | UNIQUELY MAPPING READS |
|------------------------|-------------|------------------------|
| UWOPS03.461.4          | 70,275,289  | 37,992,498             |
| UWOPS05.217.3          | 76,341,920  | 34,547,610             |
| UWOPS05.227.2          | 63,801,895  | 28,127,756             |
| BC187                  | 62,813,354  | 35,442,506             |
| RM11-1                 | 76,501,254  | 35,055,758             |
| UWOPS03.461.4 x BC187  | 137,307,729 | 28,763,569             |
| UWOPS03.461.4 x RM11-1 | 164,905,032 | 31,783,714             |
| UWOPS05.217.3 x BC187  | 47,399,026  | 6,133,068              |

**Table S2 Strains used in this work.**

| STRAIN NAME       | PARENTS                 | GENOTYPE                                                          | SOURCE            |
|-------------------|-------------------------|-------------------------------------------------------------------|-------------------|
| UWOPS03.461.4     |                         | <i>MATa/α HO</i>                                                  | NCYC              |
| UWOPS05.217.3     |                         | <i>MATa/α HO</i>                                                  | NCYC              |
| UWOPS05.227.2     |                         | <i>MATa/α HO</i>                                                  | NCYC              |
| BC187             |                         | <i>MATa/α HO</i>                                                  | NCYC              |
| UWOPS03.461.4 a/α |                         | <i>MATa/α ura3Δ::kanMX hoΔ::hphMX</i>                             | NCYC              |
| UWOPS05.217.3 a/α |                         | <i>MATa/α ura3Δ::kanMX hoΔ::hphMX</i>                             | NCYC              |
| UWOPS05.227.2 a/α |                         | <i>MATa/α ura3Δ::kanMX hoΔ::hphMX</i>                             | NCYC              |
| BC187 a/α         |                         | <i>MATa/α ura3Δ::kanMX hoΔ::hphMX</i>                             | NCYC              |
| RM11-1            | RM11-1a x RM11-1b       | <i>MATa/α ura3 hoΔ::kanMX lys2/LYS2 leu2/LEU2</i>                 | Brem et al., 2002 |
| YPS128            |                         | <i>MATa ura3Δ::kanMX hoΔ::hphMX</i>                               | NCYC              |
| YPS606            |                         | <i>MATa ura3Δ::kanMX hoΔ::hphMX</i>                               | NCYC              |
| Y12               |                         | <i>MATa ura3Δ::kanMX hoΔ::hphMX</i>                               | NCYC              |
| NCYC110           |                         | <i>MATa ura3Δ::kanMX hoΔ::hphMX</i>                               | NCYC              |
| S288c             | BY4716 x BY4741         | <i>MATa/α lys2/LYS2 leu2/LEU2 his3/HIS3 met15/MET15 ura3/URA3</i> | this study        |
| UWOPS03.461.4 a   |                         | <i>MATa ura3Δ::kanMX hoΔ::hphMX</i>                               | NCYC              |
| UWOPS03.461.4 α   |                         | <i>MATα ura3Δ::kanMX hoΔ::hphMX</i>                               | NCYC              |
| UWOPS05.217.3 a   |                         | <i>MATa ura3Δ::kanMX hoΔ::hphMX</i>                               | NCYC              |
| UWOPS05.217.3 α   |                         | <i>MATα ura3Δ::kanMX hoΔ::hphMX</i>                               | NCYC              |
| BC187 a           |                         | <i>MATa ura3Δ::kanMX hoΔ::hphMX</i>                               | NCYC              |
| BC187 α           |                         | <i>MATα ura3Δ::kanMX hoΔ::hphMX</i>                               | NCYC              |
| RM11-1a           |                         | <i>MATa leu2 ura3 hoΔ::kanMX</i>                                  | Brem et al., 2002 |
| RM11-1b           |                         | <i>MATα lys2 ura3 hoΔ::kanMX</i>                                  | Brem et al., 2002 |
| YHL058            | UWOPS03.461.4 x RM11-1b | <i>MATa/α HO/hoΔ::kanMX</i>                                       | this study        |
| YHL063            | UWOPS03.461.4 x BC187   | <i>MATa/α HO</i>                                                  | this study        |
| YHL065            | UWOPS05.217.3 x BC187   | <i>MATa/α HO</i>                                                  | this study        |

|        |                                  |                                                                                                                                              |            |
|--------|----------------------------------|----------------------------------------------------------------------------------------------------------------------------------------------|------------|
| YHL243 | UWOPS03.461.4 $\alpha$ x BC187 a | <i>MATa/<math>\alpha</math> ura3<math>\Delta</math>::kanMX ho<math>\Delta</math>::hphMX</i>                                                  | this study |
| YHL247 | UWOPS03.461.4 a x BC187 $\alpha$ | <i>MATa/<math>\alpha</math> ura3<math>\Delta</math>::kanMX ho<math>\Delta</math>::hphMX</i>                                                  | this study |
| YHL387 | YHL243                           | <i>MATa/<math>\alpha</math> ura3<math>\Delta</math>::kanMX ho<math>\Delta</math>::hphMX aft1<math>\Delta</math>::URA3/AFT1-Malaysian</i>     | this study |
| YHL388 | YHL243                           | <i>MATa/<math>\alpha</math> ura3<math>\Delta</math>::kanMX ho<math>\Delta</math>::hphMX aft1<math>\Delta</math>::URA3/AFT1-Wine/European</i> | this study |
| YHL389 | YHL243                           | <i>MATa/<math>\alpha</math> ura3<math>\Delta</math>::kanMX ho<math>\Delta</math>::hphMX aft1<math>\Delta</math>::URA3/AFT1-Malaysian</i>     | this study |
| YHL409 | YHL243                           | <i>MATa/<math>\alpha</math> ura3<math>\Delta</math>::kanMX ho<math>\Delta</math>::hphMX yap5<math>\Delta</math>::URA3/YAP5-Malaysian</i>     | this study |
| YHL410 | YHL243                           | <i>MATa/<math>\alpha</math> ura3<math>\Delta</math>::kanMX ho<math>\Delta</math>::hphMX yap5<math>\Delta</math>::URA3/YAP5-Malaysian</i>     | this study |
| YHL411 | YHL243                           | <i>MATa/<math>\alpha</math> ura3<math>\Delta</math>::kanMX ho<math>\Delta</math>::hphMX yap5<math>\Delta</math>::URA3/YAP5-WineEuropean</i>  | this study |
| YHL413 | YHL247                           | <i>MATa/<math>\alpha</math> ura3<math>\Delta</math>::kanMX ho<math>\Delta</math>::hphMX yap5<math>\Delta</math>::URA3/YAP5-Malaysian</i>     | this study |
| YHL414 | YHL247                           | <i>MATa/<math>\alpha</math> ura3<math>\Delta</math>::kanMX ho<math>\Delta</math>::hphMX yap5<math>\Delta</math>::URA3/YAP5-WineEuropean</i>  | this study |
| YHL415 | YHL247                           | <i>MATa/<math>\alpha</math> ura3<math>\Delta</math>::kanMX ho<math>\Delta</math>::hphMX yap5<math>\Delta</math>::URA3/YAP5-Malaysian</i>     | this study |
| YHL449 | YHL243                           | <i>MATa/<math>\alpha</math> ura3<math>\Delta</math>::kanMX ho<math>\Delta</math>::hphMX ccc1<math>\Delta</math>::URA3/CCC1-Wine/European</i> | this study |
| YHL450 | YHL243                           | <i>MATa/<math>\alpha</math> ura3<math>\Delta</math>::kanMX ho<math>\Delta</math>::hphMX ccc1<math>\Delta</math>::URA3/CCC1-Malaysian</i>     | this study |
| YHL451 | YHL243                           | <i>MATa/<math>\alpha</math> ura3<math>\Delta</math>::kanMX ho<math>\Delta</math>::hphMX ccc1<math>\Delta</math>::URA3/CCC1-Malaysian</i>     | this study |
| YHL459 | YHL243                           | <i>MATa/<math>\alpha</math> ura3<math>\Delta</math>::kanMX ho<math>\Delta</math>::hphMX ccc1<math>\Delta</math>::URA3/CCC1-Wine/European</i> | this study |
| YHL452 | YHL247                           | <i>MATa/<math>\alpha</math> ura3<math>\Delta</math>::kanMX ho<math>\Delta</math>::hphMX ccc1<math>\Delta</math>::URA3/CCC1-Wine/European</i> | this study |
| YHL455 | YHL243                           | <i>MATa/<math>\alpha</math> ura3<math>\Delta</math>::kanMX ho<math>\Delta</math>::hphMX aft1<math>\Delta</math>::URA3/AFT1-Wine/European</i> | this study |
