# Supplementary material for: Divergence of Iron Metabolism in Wild Malaysian Yeast
Source: PubMed Central journal article supplement (PMC3852381; doi:10.1534/g3.113.008011), 2013-10-18
Supplement: supp_g3.113.008011_FigureS1.pdf [file supp_g3.113.008011_FigureS1.pdf]

**A**

|               |    | ★ ★ bZIP_1                                                                   |    |  |  |
|---------------|----|------------------------------------------------------------------------------|----|--|--|
|               |    | R44G Q67H                                                                    |    |  |  |
| YPS606        | 21 | KIHVSKNWKLPRLPHRAAQRKRVRHLHEDYETEENDEELQKKRQNRDAQRAYRERKN                    | 80 |  |  |
| Y12           | 21 | KIHVSKNWKLPRLPHRAAQRKRVRHLHEDYETEENDEELQKKRQNRDAQRAYRERKN                    | 80 |  |  |
| YPS128        | 21 | KIHVSKNWKLPRLPHRAAQRKRVRHLHEDYETEENDEELQKKRQNRDAQRAYRERKN                    | 80 |  |  |
| Y9            | 21 | KIHVSKNWKLPRLPHRAAQRKRVRHLHEDYETEENDEELQKKRQNRDAQRAYRERKN                    | 80 |  |  |
| DBVPG6765     | 21 | KIHVSKNWKLPRLPHRAAQRKRVRHLHEDYETEENDEELQKKRQNRDAQRAYRERKN                    | 80 |  |  |
| BC187         | 21 | KIHVSKNWKLPRLPHRAAQRKRVRHLHEDYETEENDEELQKKRQNRDAQRAYRERKN                    | 80 |  |  |
| YJM981        | 21 | KIHVSKNWKLPRLPHRAAQRKRVRHLHEDYETEENDEELQKKRQNRDAQRAYRERKN                    | 80 |  |  |
| DBVPG1106     | 21 | KIHVSKNWKLPRLPHRAAQRKRVRHLHEDYETEENDEELQKKRQNRDAQRAYRERKN                    | 80 |  |  |
| DBVPG1373     | 21 | KIHVSKNWKLPRLPHRAAQRKRVRHLHEDYETEENDEELQKKRQNRDAQRAYRERKN                    | 80 |  |  |
| YJM978        | 21 | KIHVSKNWKLPRLPHRAAQRKRVRHLHEDYETEENDEELQKKRQNRDAQRAYRERKN                    | 80 |  |  |
| S288c         | 21 | KIHVSKNWKLPRLPHRAAQRKRVRHLHEDYETEENDEELQKKRQNRDAQRAYRERKN                    | 80 |  |  |
| YJM975        | 21 | KIHVSKNWKLPRLPHRAAQRKRVRHLHEDYETEENDEELQKKRQNRDAQRAYRERKN                    | 80 |  |  |
| L_1528        | 21 | KIHVSKNWKLPRLPHRAAQRKRVRHLHEDYETEENDEELQKKRQNRDAQRAYRERKN                    | 80 |  |  |
| RM11_1A       | 21 | KIHVSKNWKLPRLPHRAAQRKRVRHLHEDYETEENDEELQKKRQNRDAQRAYRERKN                    | 80 |  |  |
| DBVPG1788     | 21 | KIHVSKNWKLPRLPHRAAQRKRVRHLHEDYETEENDEELQKKRQNRDAQRAYRERKN                    | 80 |  |  |
| L_1374        | 21 | KIHVSKNWKLPRLPHRAAQRKRVRHLHEDYETEENDEELQKKRQNRDAQRAYRERKN                    | 80 |  |  |
| UWOPS05_227_2 | 21 | KIHVSKNWKLPRLPHRAAQRKR <b>G</b> VHRLHEDYETEENDEELQKKR <b>H</b> NRDAQRAYRERKN | 80 |  |  |
| UWOPS05_217_3 | 21 | KIHVSKNWKLPRLPHRAAQRKR <b>G</b> VHRLHEDYETEENDEELQKKR <b>H</b> NRDAQRAYRERKN | 80 |  |  |
| UWOPS03_461_4 | 21 | KIHVSKNWKLPRLPHRAAQRKR <b>G</b> VHRLHEDYETEENDEELQKKR <b>H</b> NRDAQRAYRERKN | 80 |  |  |
| DBVPG6044     | 21 | KIHVSKNWKLPRLPHRAAQRKRVRHLHEDYETEENDEELQKKRQNRDAQRAYRERQN                    | 80 |  |  |
| NCYC110       | 21 | KIHVSKNWKLPRLPHRAAQRKRVRHLHEDYETEENDEELQKKRQNRDAQRAYRERQN                    | 80 |  |  |
| S. paradoxus  | 21 | KIHVSKNWKLPRLPHRATQRKRRAHRLHEEYETEGNDEALQKKRQNRDAQRAYRERKN                   | 80 |  |  |

**B**

|               |   | ★ VIT1                                                         |    |  |  |
|---------------|---|----------------------------------------------------------------|----|--|--|
|               |   | G22R                                                           |    |  |  |
| UWOPS05_227_2 | 1 | MSIVALKNNAVVTLIQKAKGSGRTSELGGSESTPLLRGSNSNSSRHDNLSSSSSDI IYGRN | 60 |  |  |
| UWOPS05_217_3 | 1 | MSIVALKNNAVVTLIQKAKGSGRTSELGGSESTPLLRGSNSNSSRHDNLSSSSSDI IYGRN | 60 |  |  |
| UWOPS03_461_4 | 1 | MSIVALKNNAVVTLIQKAKGSGRTSELGGSESTPLLRGSNSNSSRHDNLSSSSSDI IYGRN | 60 |  |  |
| DBVPG6765     | 1 | MSIVALKNNAVVTLIQKAKGSGGTSELGGSESTPLLRGSNSNSSRHDNLSSSSSDI IYGRN | 60 |  |  |
| DBVPG1788     | 1 | MSIVALKNNAVVTLIQKAKGSGGTSELGGSESTPLLRGSNSNSSRHDNLSSSSSDI IYGRN | 60 |  |  |
| RM11_1A       | 1 | MSIVALKNNAVVTLIQKAKGSGGTSELGGSESTPLLRGSNSNSSRHDNLSSSSSDI IYGRN | 60 |  |  |
| L_1528        | 1 | MSIVALKNNAVVTLIQKAKGSGGTSELGGSESTPLLRGSNSNSSRHDNLSSSSSDI IYGRN | 60 |  |  |
| YJM789        | 1 | MSIVALKNNAVVTLIQKAKGSGGTSELGGSESTPLLRGSNSNSSRHDNLSSSSSDI IYGRN | 60 |  |  |
| YJM975        | 1 | MSIVALKNNAVVTLIQKAKGSGGTSELGGSESTPLLRGSNSNSSRHDNLSSSSSDI IYGRN | 60 |  |  |
| L_1374        | 1 | MSIVALKNNAVVTLIQKAKGSGGTSELGGSESTPLLRGSNSNSSRHDNLSSSSSDI IYGRN | 60 |  |  |
| S288c         | 1 | MSIVALKNNAVVTLIQKAKGSGGTSELGGSESTPLLRGSNSNSSRHDNLSSSSSDI IYGRN | 60 |  |  |
| YPS606        | 1 | MSIVALKNNAVVTLIQKAKGSGGTSELGGSESTPLLRGSNSNSSRHDNLSSSSSDI IYGRN | 60 |  |  |
| Y12           | 1 | MSIVALKNNAVVTLIQKAKGSGGTSELGGSESTPLLRGSNSNSSRHDNLSSSSSDI IYGRN | 60 |  |  |
| YPS128        | 1 | MSIVALKNNAVVTLIQKAKGSGGTSELGGSESTPLLRGSNSNSSRHDNLSSSSSDI IYGRN | 60 |  |  |
| YJM978        | 1 | MSIVALKNNAVVTLIQKAKGSGGTSELGGSESTPLLRGSNSNSSRHDNLSSSSSDI IYGRN | 60 |  |  |
| Y9            | 1 | MSIVALKNNAVVTLIQKAKGSGGTSELGGSESTPLLRGSNSNSSRHDNLSSSSSDI IYGRN | 60 |  |  |
| NCYC110       | 1 | MSIVALKNNAVVTLIQKAKGSGGTSELGGSESTPLLRGSNSNSSRHDNLSSSSSDI IYGRN | 60 |  |  |
| DBVPG1373     | 1 | MSIVALKNNAVVTLIQKAKGSGGTSELGGSESTPLLRGSNSNSSRHDNLSSSSSDI IYGRN | 60 |  |  |
| YJM981        | 1 | MSIVALKNNAVVTLIQKAKGSGGTSELGGSESTPLLRGSNSNSSRHDNLSSSSSDI IYGRN | 60 |  |  |
| BC187         | 1 | MSIVALKNNAVVTLIQKAKGSGGTSELGGSESTPLLRGSNSNSSRHDNLSSSSSDI IYGRN | 60 |  |  |
| DBVPG1106     | 1 | MSIVALKNNAVVTLIQKAKGSGGTSELGGSESTPLLRGSNSNSSRHDNLSSSSSDI IYGRN | 60 |  |  |
| DBVPG6044     | 1 | MSIVALKNNAVVTLIQKAKGSGGTSELGGSESTPLLRGSNSNSSRHDNLSSSSSDI IYGRN | 60 |  |  |
| S. paradoxus  | 1 | MSIVALKNNAVVTLIQKAKGSGGTSDLGGSESTPLLRGSNSNSSRHDNLSSNSDI IYGRN  | 60 |  |  |

**C**

|               |     | NLS                                                                   |     | NLS |  |       |  |
|---------------|-----|-----------------------------------------------------------------------|-----|-----|--|-------|--|
|               |     | AFT                                                                   |     | ★   |  | P354S |  |
| K11           | 301 | SFNVVLPNTSNVTSSASSSTVSSISLDSSNASKRCLPVSNNVTGSINTNNVRKPKSQCKN          | 360 |     |  |       |  |
| Y12           | 301 | SFNVVLPNTSNVTSSASSSTVSSISLDSSNASKRCLPVSNNVTGSINTNNVRKPKSQCKN          | 360 |     |  |       |  |
| Y9            | 301 | SFNVVLPNTSNVTSSASSSTVSSISLDSSNASKRCLPVSNNVTGSINTNNVRKPKSQCKN          | 360 |     |  |       |  |
| NCYC110       | 301 | SFNVVLPNTSNVTSSASSSTVSSISLDSSNASKRCLPVSNNVTGSINTNNVRKPKSQCKN          | 360 |     |  |       |  |
| DBVPG6044     | 301 | SFNVVLPNTSNVTSSASSSTVSSISLDSSNASKRCLPVSNNVTGSINTNNVRKPKSQCKN          | 360 |     |  |       |  |
| UWOPS05_227_2 | 301 | SFNVVLPNTSNVTSSASSSTVSSISLDSSNASKRCLPVSNNVTGSINTNNVRK <b>S</b> KSQCKN | 360 |     |  |       |  |
| UWOPS05_217_3 | 301 | SFNVVLPNTSNVTSSASSSTVSSISLDSSNASKRCLPVSNNVTGSINTNNVRK <b>S</b> KSQCKN | 360 |     |  |       |  |
| UWOPS03_461_4 | 301 | SFNVVLPNTSNVTSSASSSTVSSISLDSSNASKRCLPVSNNVTGSINTNNVRK <b>S</b> KSQCKN | 360 |     |  |       |  |
| YPS606        | 301 | SFNVVLPNTSNVTSSASSSTVSSISLDSSNASKRCLPVSNNVTGSINTNNVRKPKSQCKN          | 360 |     |  |       |  |
| YPS128        | 301 | SFNVVLPNTSNVTSSASSSTVSSISLDSSNASKRCLPVSNNVTGSINTNNVRKPKSQCKN          | 360 |     |  |       |  |
| DBVPG6765     | 301 | SFNVVLPNTSNVTSSASSSTVSSISLDSSNASKRCLPVSNNVTGSINTNNVRKPKSQCKN          | 360 |     |  |       |  |
| YJM975        | 301 | SFNVVLPNTSNVTSSASSSTVSSISLDSSNASKRCLPVSNNVTGSINTNNVRKPKSQCKN          | 360 |     |  |       |  |
| BC187         | 301 | SFNVVLPNTSNVTSSASSSTVSSISLDSSNASKRCLPVSNNVTGSINTNNVRKPKSQCKN          | 360 |     |  |       |  |
| YJM981        | 301 | SFNVVLPNTSNVTSSASSSTVSSISLDSSNASKRCLPVSNNVTGSINTNNVRKPKSQCKN          | 360 |     |  |       |  |
| DBVPG1106     | 301 | SFNVVLPNTSNVTSSASSSTVSSISLDSSNASKRCLPVSNNVTGSINTNNVRKPKSQCKN          | 360 |     |  |       |  |
| DBVPG1373     | 301 | SFNVVLPNTSNVTSSASSSTVSSISLDSSNASKRCLPVSNNVTGSINTNNVRKPKSQCKN          | 360 |     |  |       |  |
| Y55           | 301 | SFNVVLPNTSNVTSSASSSTVSSISLDSSNASKRCLPVSNNVTGSINTNNVRKPKSQCKN          | 360 |     |  |       |  |
| YJM978        | 301 | SFNVVLPNTSNVTSSASSSTVSSISLDSSNASKRCLPVSNNVTGSINTNNVRKPKSQCKN          | 360 |     |  |       |  |
| L_1374        | 301 | SFNVVLPNTSNVTSSASSSTVSSISLDSSNASKRCLPVSNNVTGSINTNNVRKPKSQCKN          | 360 |     |  |       |  |
| L_1528        | 301 | SFNVVLPNTSNVTSSASSSTVSSISLDSSNASKRCLPVSNNVTGSINTNNVRKPKSQCKN          | 360 |     |  |       |  |
| DBVPG1788     | 301 | SFNVVLPNTSNVTSSASSSTVSSISLDSSNASKRCLPVSNNVTGSINTNNVRKPKSQCKN          | 360 |     |  |       |  |
| RM11_1A       | 301 | SFNVVLPNTSNVTSSASSSTVSSISLDSSNASKRCLPVSNNVTGSINTNNVRKPKSQCKN          | 360 |     |  |       |  |
| S. paradoxus  | 299 | SFNVVLPNTSNVSSASSSTVSSISLDSSNASKRCLPVSNNVTGSINTNNVRKPKSQCKN           | 358 |     |  |       |  |

**Figure S1 Coding variants private to Malaysian yeast strains in iron-metabolism genes.** Each panel shows the coding variants private to Malaysian yeast in one iron-metabolism protein, with the variants denoted as stars in a cartoon of the protein's domain organization at top, and a protein-coding alignment below for the region containing the Malaysian variant, using sequence and strain identifiers from (LIT *et al.* 2009). (A) Yap5p; (B) Ccc1p; (C) Aft1p. Non-synonymous coding variants private to the Malaysian population are indicated in red. bZIP\_1, basic leucine zipper domain, PFAM clan 1; VIT1, vacuolar iron transport domain; AFT, activator of iron transcription domain; NLS, nuclear localization signal.
