# Supplementary material for: Divergence of Iron Metabolism in Wild Malaysian Yeast
Source: PubMed Central journal article supplement (PMC3852381; doi:10.1534/g3.113.008011), 2013-10-18
Supplement: supp_g3.113.008011_TableS1.pdf [file supp_g3.113.008011_TableS1.pdf]

**Table S1 RNA-seq statistics.**

| LIBRARY                | TOTAL READS | UNIQUELY MAPPING READS |
|------------------------|-------------|------------------------|
| UWOPS03.461.4          | 70,275,289  | 37,992,498             |
| UWOPS05.217.3          | 76,341,920  | 34,547,610             |
| UWOPS05.227.2          | 63,801,895  | 28,127,756             |
| BC187                  | 62,813,354  | 35,442,506             |
| RM11-1                 | 76,501,254  | 35,055,758             |
| UWOPS03.461.4 x BC187  | 137,307,729 | 28,763,569             |
| UWOPS03.461.4 x RM11-1 | 164,905,032 | 31,783,714             |
| UWOPS05.217.3 x BC187  | 47,399,026  | 6,133,068              |
